# Supplementary material for: Enantioselective alkylative double ring-opening of epoxides derived from cyclic allylic ethers: synthesis of enantioenriched unsaturated diolsElectronic supplementary information (ESI) available: the preparation and characterisation of derivatives for ee determinations. See http://www.rsc.org/suppdata/ob/b2/b212404a/
Source: Royal Society of Chemistry journal article supplement (doi:10.1039/b212404a), 2003-02-17
Supplement: b212404a.doc [file b212404a.doc]

**Enantioselective Alkylative Double Ring-Opening of Epoxides Derived from Cyclic Allylic Ethers: Synthesis of Enantioenriched Unsaturated Diols**

David M. Hodgson,*a Matthew A. H. Stent,a Bogdan Štefanea and Francis X. Wilsonb

*a. Dyson Perrins Laboratory, Department of Chemistry, University of Oxford, South Parks Road, Oxford, UK OX1 3QY. E-mail: david.hodgson@chem.ox.ac.uk;*

*Fax: +(44) 01865 275674; Tel: +(44) 01865 275697*

*b. Roche Discovery (Welwyn), 40 Broadwater Road, Welwyn Garden City, Herts UK AL7 3AY*

**Electronic Experimental Supplementary Information**

The preparation of and characterisation of derivatives for ee determinations.

**General details**

All reactions requiring anhydrous conditions were conducted in flame- or oven-dried apparatus under an atmosphere of argon. Syringes and needles for the transfer of reagents were dried at 140 °C and allowed to cool in a desiccator over P2O5 before use. Ethers were distilled from sodium benzophenone ketyl under argon; CH2Cl2, pentane, hexane, toluene and cumene from CaH2 under argon. External reaction temperatures are reported unless stated otherwise. Reactions were monitored by TLC using commercially available aluminium-backed plates, pre-coated with a 0.25 mm layer of silica containing a fluorescent indicator (Merck). Organic layers were dried over MgSO4 unless stated otherwise. Column chromatography was carried out on Kieselgel 60 (40–63 µm). Light petroleum refers to the fraction with bp 40–60 °C. [a]D Values are given in 10–1 deg cm2 g–1. Melting points were determined using a Gallenkamp hot stage apparatus and are uncorrected. Elemental analysis was performed by Elemental Microanalysis Limited, Okehempton, Devon, UK. IR spectra were recorded as thin films unless stated otherwise. Peak intensities are specified as strong (s), medium (m) or weak (w). 1H and 13C NMR spectra were recorded in CDCl3 unless stated otherwise with Bruker JEOL EX400 or Bruker AMX500 spectrometers. Chemical shifts are reported relative to CHCl3 [*d*H 7.26, *d*C (central line of t) 77.0]. Coupling constants (*J* ) are given in Hz. Chiral stationary phase HPLC was performed using a Daicel Chiralcel OD column (4.6 mm x 250 mm) or Daicel Chiralpak AD column (4.6 mm x 250 mm) on a Gilson System with 712 Controller Software and a 118 UV–vis detector set at 254 nm. Chiral GC was performed using on a ThermoQuest CE Instruments TRACE GC, running Chrom-Card for TRACE software, fitted with a CYDEX-b column at the stated temperature/temperature gradient. Retention times for major (*t*R mj) and minor (*t*R mn) enantiomers are given in minutes.

**1,2-Bis(3,5-dinitrobenzoate)-3-methyleneheptane**

A mixture of 3-methyleneheptane-1,2-diol **3** (10 mg, 69 mmol), 3,5-dinitrobenzoyl chloride (0.160 g, 690 mmol, 10 equiv.) and Et3N (0.20 cm3, 1.4 mmol, 20 equiv.) in CH2Cl2 (8 cm3) was stirred for 16 h. The mixture was absorbed onto silica gel (1.0 g) and purified by column chromatography (50% Et2O in petrol) giving the *diester* as a pale yellow solid (28 mg, 76%); *R*f 0.20 (20% Et2O in petrol); mp. 93-94 °C (EtOH); (Found: C, 49.6; H, 3.7; N, 10.4. C22H20N4O12 requires C, 49.6; H, 3.8; N, 10.5%); *n*max/cm–1 (CHCl3) 3102w, 2958w, 1737s, 1629m, 1547s, 1345s, 1286s and 1160s; *d*H(400 MHz) 9.24 (1 H, d, *J* 2.0, ArH), 9.21 (1 H, d, *J* 2.0, ArH), 9.17 (2 H, d, *J* 2.0, 2 x ArH), 9.10 (2 H, d, *J* 2.0, 2 x ArH), 5.93 (1 H, dd, *J* 8.0 and 2.8, C(2)-H), 5.33 (1 H, s, C=CH2), 5.22 (1 H, s, C=CH2), 4.85 (1 H, dd, *J* 12.0 and 2.8, C(1)-H), 4.71 (1 H, dd, *J* 12.0 and 8.0, C(1)-H), 2.27 (2 H, t, *J* 7.8, 2 x C(4)-H), 1.61-1.55 (2 H, m, 2 x C(5)-H), 1.45-1.39 (2 H, m, 2 x C(6)-H) and 0.96 (3 H, t, *J* 7.2, CH3); *d*C(100 MHz) 162.2 (C=O), 161.8 (C=O), 148.7 (2 x ArC-NO2), 148.7 (2 x ArC-NO2), 143.0 (C(3)), 133.2 (ArC), 133.0 (ArC), 129.5 (4 x ArC-H), 122.8 (ArC-H), 122.7 (ArC-H), 114.4 (C=*C*H2), 76.2 (C(2)), 66.2 (C(1)), 32.8 (C(4)), 29.0 (C(5)), 22.4 (C(6)) and 13.9 (CH3); *m/z* [CI + (NH3)] 550 (M + NH4+, 80%), 520 (100), 490 (60), 443 (50) and 391 (60) (Found: M + NH4+, 550.1436. C22H24N5O12 requires 550.1436); Chiral HPLC gave resolution of both enantiomers: OD Column, 80% EtOH in heptane, 1.0 cm3 min–1, *t*R 24.0 and 34.0.

3-Methyleneheptane-1,2-diol **3** having [a]25D +9.0 (c 1.0 in CHCl3) was determined to have 55% ee following derivatisation as described above (major enantiomer elutes first).

**4-Methylbut-3-ene-1,2-diol**9,10: The ee of the product arising from the reaction of 3,4-epoxytetrahydrofuran with MeLi was determined by HPLC analysis following derivatisation as the bis(3,5-dinitrobenzoate); OD Column, 80% EtOH in heptane, 1.0 cm3 min–1, *t*R 32.8 and 47.7. Diol with [a]25D 0.0 (c 1.0 in CHCl3) obtained from a (–)-sparteine mediated reaction was found to have 15% ee (major enantiomer elutes second) following derivatisation.

**4-Methyl-3-methylenepentane-1,2-diol**9,10: The ee of the product arising from the reaction of 3,4-epoxytetrahydrofuran with PriLi was determined by HPLC analysis following derivatisation as the bis(3,5-dinitrobenzoate); OD Column, 80% EtOH in heptane, 1.0 cm3 min–1, *t*R 27.3 and 37.8. Diol with [a]25D –7.0 (c 1.0 in CHCl3) obtained from a (–)-sparteine mediated reaction was found to have 46% ee (major enantiomer elutes second) following derivatisation.

**3-Methylene-4-(trimethylsilyl)butane-1,2-diol**9,10: The ee of the product arising from the reaction of 3,4-epoxytetrahydrofuran with Me3SiCH2Li was determined by HPLC analysis following derivatisation as the bis(3,5-dinitrobenzoate); OD Column, 80% EtOH in heptane, 0.75 cm3 min–1, *t*R 29.3 and 35.1. Diol with [a]25D +11.2 (c 1.0 in CHCl3) obtained from a (–)-sparteine mediated reaction was found to have 26% ee (major enantiomer elutes second) following derivatisation.

**3-Phenylbut-3-ene-1,2-diol**9,10: The ee of the product arising from the reaction of 3,4-epoxytetrahydrofuran with PhLi was determined by HPLC analysis; OD Column, 5% EtOH in heptane, 0.5 cm3 min–1, *t*R 24.0 and 31.0. Diol with [a]25D +35.1 (c 1.0 in CHCl3) obtained from a (–)-sparteine mediated reaction was found to have 46% ee (major enantiomer elutes first).

**1,2-Bis(3,5-dinitrobenzoate)-5,6-bis(methoxymethyl)-3-butylcyclohex-3-ene**

A mixture of 3-butyl-5,6-bis(methoxymethyl)cyclohex-3-ene-1,2-diol **28** (R = Bu*n*)(8 mg, 31 mmol), 3,5-dinitrobenzoyl chloride (71 mg, 310 mmol, 10 equiv.) and Et3N (90 mL, 620 mmol, 20 equiv.) in CH2Cl2 (5 cm3) was stirred for 16 h. Following absorption onto silica gel (1.0 g) the *diester* (12 mg, 60%) was obtained as a white solid by column chromatography (SiO2, 50% Et2O in petrol); *R*f 0.30 (50% Et2O in petrol); mp. 58-60 °C (EtOH); (Found: C, 51.5; H, 4.6; N, 8.5. C28H30N4O14 requires C, 52.0; H, 4.7; N, 8.7%); *n*max/cm–1 (CHCl3) 3104m, 2930m, 1732s, 1630s, 1548s, 1461m, 1345s, 1285s, 1169s, 1110s and 912s; *d*H(400 MHz) 9.28 (1 H, t, *J* 2.0, ArH), 9.19 (1 H, t, *J* 2.0, ArH), 9.11 (2 H, d, *J* 2.0, 2 x ArH), 8.94 (2 H, d, *J* 2.0, 2 x ArH), 6.03 (1 H, d, *J* 4.0, C(2)-H), 5.92 (1 H, br s, C(4)-H), 5.72 (1 H, t, *J* 4.0, C(1)-H), 3.75-3.65 (3 H, m, CH2 and C*H*H), 3.50 (1 H, t, *J* 8.8, CH*H*), 3.44 (3 H, s, OCH3), 3.33 (3 H, s, OCH3), 2.90-2.88 (1 H, m, C(6)-H), 2.71-2.65 (1 H, m, C(5)-H), 2.09 (2 H, t, *J* 7.6, CH2), 1.52-1.39 (2 H, m, CH2), 1.37-1.25 (2 H, m, CH2) and 0.88 (3 H, t, *J* 7.2, CH3); *d*C(100 MHz) 162.4 (C=O), 161.7 (C=O), 148.8 (2 x ArC-NO2), 148.7 (2 x ArC-NO2), 133.4 (ArC), 133.2 (C(3)), 132.9 (ArC), 129.4 (2 x ArC-H), 129.3 (2 x ArC-H), 128.4 (C(4)), 122.9 (ArC-H), 122.7 (ArC-H), 73.5 (OCH2), 72.9 (C(1)), 70.8 (C(2)), 69.7 (OCH2), 59.0 (OCH3), 58.9 (OCH3), 38.9 (C(6)), 37.8 (C(5)), 32.8 (CH2), 29.8 (CH2), 22.7 (CH2) and 13.8 (CH3); Chiral HPLC gave resolution of both enantiomers: OD Column, 80% EtOH in heptane, 1.0 cm3 min–1, *t*R 19.0 and 41.8.

3-Butyl-5,6-bis(methoxymethyl)cyclohex-3-ene-1,2-diol having [a]25D +28.7 (c 1.0 in CHCl3) was determined to have 34% ee following derivatisation as described above (major enantiomer elutes first).

**1,2-Bis(3,5-dinitrobenzoate)-5,6-bis(methoxymethyl)-3-isopropylcyclohex-3-ene**

A mixture of 5,6-bis(methoxymethyl)-3-isopropylcyclohex-3-ene-1,2-diol **28** (R = Pri)(15 mg, 56 mmol), 3,5-dinitrobenzoyl chloride (0.130 g, 560 mmol, 10 equiv.) and Et3N (0.16 cm3, 1.1 mmol, 20 equiv.) in CH2Cl2 (7 cm3) was stirred together for 16 h. Following absorption onto silica gel (1.0 g) the *diester* (25 mg, 71%) was obtained as a white solid by column chromatography (SiO2, 50% Et2O in petrol); *R*f 0.30 (50% Et2O in petrol); mp. 157-158 °C (EtOH); (Found: C, 51.4; H, 4.5; N, 8.7. C27H28N4O14 requires C, 51.3; H, 4.5; N, 8.9%); *n*max/cm–1 (CHCl3) 3030w, 1736m, 1630w, 1549s, 1345s, 1284m and 1216s; *d*H(400 MHz) 9.29 (1 H, t, *J* 2.0, ArH), 9.19 (1 H, t, *J* 2.0, ArH), 9.12 (2 H, d, *J* 2.0, 2 x ArH), 8.92 (2 H, d, *J* 2.0, 2 x ArH), 6.15 (1 H, d, *J* 4.0, C(2)-H), 5.94 (1 H, br s, C(4)-H), 5.68 (1 H, t, *J* 4.0, C(1)-H), 3.75 (1 H, dd, *J* 9.6 and 5.6, C*H*H), 3.69-3.64 (2 H, m, CH2), 3.51 (1 H, t, *J* 5.6, CH*H*), 3.44 (3 H, s, OCH3), 3.33 (3 H, s, OCH3), 2.94-2.85 (1 H, m, C(6)-H), 2.71-2.65 (1 H, m, C(5)-H), 2.34 (1 H, sept., *J* 6.8, C*H*(CH3)2), 1.14 (3 H, s, CH(C*H*3)2) and 1.07 (3 H, s, CH(C*H*3)2); *d*C(100 MHz) 162.5 (C=O), 161.6 (C=O), 148.9 (2 x ArC-NO2), 148.6 (2 x ArC-NO2), 139.0 (C(3)), 133.3 (ArC), 132.9 (ArC), 129.4 (2 x ArC-H), 129.3 (2 x ArC-H), 126.5 (C(4)), 123.0 (ArC-H), 122.7 (ArC-H), 73.5 (CH2), 73.3 (C(1)), 69.8 (C(2)), 69.6 (CH2), 59.0 (OCH3), 59.0 (OCH3), 39.1 (C(6)), 37.7 (C(5)), 30.9 (*C*H(CH3)2), 22.2 (CH(*C*H3)2) and 21.3 (CH(*C*H3)2); Chiral HPLC gave resolution of both enantiomers: OD Column, 80% EtOH in heptane, 1.0 cm3 min–1, *t*R 16.8 and 42.2.

5,6-Bis(methoxymethyl)-3-isopropylcyclohex-3-ene-1,2-diol having [a]25D +33.2 (c 1.0 in CHCl3) was determined to have 63% ee following derivatisation as described above (major enantiomer elutes first).

**4,5-Bis(3,5-dinitrobenzoate)-3-butylbicyclo[4.1.0]hept-2-en-7-one neopentyl acetal**

A mixture of 3-butyl-4,5-dihydroxybicyclo[4.1.0]hept-2-en-7-one neopentyl acetal **30** (R = Bu*n*) (8 mg, 28 mmol), 3,5-dinitrobenzoyl chloride (65 mg, 280 mmol, 10 equiv.) and Et3N (80 mL, 560 mmol, 20 equiv.) in CH2Cl2 (5 cm3) was stirred together for 16 h. Following absorption onto silica gel (1.0 g) the *diester* (14 mg, 75%) was obtained as a white solid by column chromatography (SiO2, 50% Et2O in petrol); *R*f 0.35 (50% Et2O in petrol); mp. 114-115 °C (EtOH); (Found: C, 53.6; H, 4.6; N, 8.2. C30H30N4O14 requires C, 53.7; H, 4.5; N, 8.4%); *n*max/cm–1 (CHCl3) 3103w, 2961w, 1732s, 1629m, 1548s, 1345s, 1282m and 1216m; *d*H(400 MHz) 9.31 (1 H, t, *J* 2.0, ArH), 9.27 (2 H, d, *J* 2.0, 2 x ArH), 9.11 (1 H, t, *J* 2.0, ArH), 8.84 (2 H, d, *J* 2.0, 2 x ArH), 6.06-6.03 (2 H, m, C(2)-H and C(4)-H), 5.91 (1 H, t, *J* 5.6, C(5)-H), 3.98 (1 H, d, *J* 10.6, OC*H*H), 3.63-3.57 (2 H, m, OCH2), 3.38 (1 H, d, *J* 10.6, OCH*H*), 2.23 (1 H, dd, *J* 10.4 and 5.6, C(6)-H), 2.15 (1H, dd, *J* 10.4 and 5.2, C(1)-H), 2.11-2.07 (2 H, m, CH2), 1.50-1.38 (2 H, m, CH2), 1.34 (3 H, s, CCH3), 1.34-1.29 (2 H, m, CH2), 0.89 (3 H, s, CCH3) and 0.87 (3 H, t, *J* 7.2, CH3); *d*C(100 MHz) 163.5 (C=O), 161.6 (C=O), 148.8 (2 x ArC-NO2), 148.5 (2 x ArC-NO2), 133.4 (ArC), 133.3 (ArC), 132.0 (C(3)), 129.8 (2 x ArC-H), 129.3 (2 x ArC-H), 122.9 (ArC-H), 122.6 (ArC-H), 122.0 (C(2)), 92.9 (C(7)), 77.2 (OCH2), 76.6 (OCH2), 69.7 (C(5)), 68.4 (C(4)), 34.0 (CH2), 30.7 (CH2), 29.8 (*C*(CH3)2), 26.3 (C(1)), 25.7 (C(6)), 22.9 (CH2), 22.1 (C(*C*H3)2), 22.0 (C(*C*H3)2) and 13.8 (CH3); Chiral HPLC gave resolution of both enantiomers: OD Column, 80% EtOH in heptane, 1.0 cm3 min–1, *t*R 19.9 and 26.3.

3-Butyl-4,5-dihydroxybicyclo[4.1.0]hept-2-en-7-one neopentyl acetal [a]25D +21.5 (c 1.0 in CHCl3) was determined to have 27% ee following derivatisation as described above (major enantiomer elutes first).

**4,5-Bis(3,5-dinitrobenzoate)-3-isopropylbicyclo[4.1.0]hept-2-en-7-one neopentyl acetal**

A mixture of 4,5-dihydroxy-3-isopropylbicyclo[4.1.0]hept-2-en-7-one neopentyl acetal **30** (R = Pri) (20 mg, 75 mmol), 3,5-dinitrobenzoyl chloride (0.170 g, 750 mmol, 10 equiv.) and Et3N (0.21 cm3, 1.50 mmol, 20 equiv.) in CH2Cl2 (10 cm3) was stirred together for 16 h. Following absorption onto silica gel (1.5 g) the *diester* (40 mg, 81%) was obtained as a white solid by column chromatography (SiO2, 50% Et2O in petrol); *R*f 0.40 (50% Et2O in petrol); mp. 121-122 °C (EtOH); *n*max/cm–1 (CHCl3) 2956w, 2871w, 1732s, 1630m, 1548s and 1345s; *d*H(400 MHz) 9.31 (1 H, t, *J* 2.0, ArH), 9.27 (2 H, d, *J* 2.0, 2 x ArH), 9.11 (1 H, t, *J* 2.0, ArH), 8.84 (2 H, d, *J* 2.0, 2 x ArH), 6.15 (1 H, d, *J* 6.4, C(5)-H), 6.11 (1 H, d, *J* 5.6, C(2)-H), 5.89 (1 H, t, *J* 6.0, C(4)-H), 3.99 (1 H, dd, *J* 10.8 and 1.6, OC*H*H), 3.64-3.57 (2 H, m, OCH2), 3.36 (1 H, d, *J* 10.8, OCH*H*), 2.31 (1 H, sept., *J* 6.8, C*H*(CH3)2), 2.24 (1 H, dd, *J* 10.4 and 5.6, C(6)-H), 2.17 (1 H, dd, *J* 10.4 and 6.4, C(1)-H), 1.36 (3 H, s, CCH3), 1.10 (3 H, d, *J* 6.8, CH(C*H*3)2), 1.07 (3 H, d, *J* 6.8, CH(C*H*3)2) and 0.89 (3 H, s, CCH3); *d*C(100 MHz) 163.5 (C=O), 161.6 (C=O), 148.9 (2 x ArC-NO2), 148.5 (2 x ArC-NO2), 137.7 (C(3)), 133.5 (ArC), 133.3 (ArC), 129.8 (2 x ArC-H), 129.3 (2 x ArC-H), 122.9 (ArC-H), 122.6 (ArC-H), 122.5 (C(2)), 92.9 (C(7)), 77.2 (OCH2), 77.0 (OCH2), 69.9 (C(4)), 67.5 (C(5)), 32.5 (*C*H(CH3)2), 30.7 (*C*(CH3)2), 26.2 (C(6)), 25.9 (C(1)), 22.9 (C(*C*H3)2), 22.2 (CH(*C*H3)2), 22.0 (CH(*C*H3)2) and 21.7 (C(*C*H3)2); Chiral HPLC gave resolution of both enantiomers: OD Column, 80% EtOH in heptane, 1.0 cm3 min–1, *t*R 18.9 and 23.7.

4,5-Dihydroxy-3-isopropylbicyclo[4.1.0]hept-2-en-7-one neopentyl acetal having [a]25D +35.0 (c 1.0 in CHCl3) was determined to have 59% ee following derivatisation as described above (major enantiomer elutes first).

**1,2-Bis(3,5-dinitrobenzoate)-3-isopropylcyclohept-3-ene**

A mixture of 3-isopropylcyclohept-3-ene-1,2-diol **45** (7 mg, 41 mmol), 3,5-dinitrobenzoyl chloride (0.100 g, 410 mmol, 10 equiv.) and Et3N (0.12 cm3, 820 mmol, 20 equiv.) in CH2Cl2 (2 cm3) was stirred together for 16 h. Following absorption onto silica gel (1.0 g) the *diester* (16 mg, 71%) was obtained as a white solid by column chromatography (SiO2, 25% Et2O in petrol); *R*f 0.15 (25% Et2O in petrol); mp. 72 °C (EtOH, decomp.); (Found: C, 51.6; H, 3.8; N, 9.6. C24H22N4O12 requires C, 51.6; H, 4.0; N 10.0%); *n*max/cm–1 (KBr) 3102m, 2960m, 1732s, 1629m, 1546s, 1461m, 1345s, 1282s, 1163s and 1074m; *d*H(400 MHz) 9.29 (1 H, t, *J* 2.4, ArH), 9.23 (1 H, t, *J* 2.4, ArH), 9.20 (2 H, d, *J* 2.4, 2 x ArCH), 9.08 (2 H, d, *J* 2.4, 2 x ArH), 6.12 (1 H, dd, *J* 8.4 and 4.8, C(4)-H), 6.04 (1 H, br s, C(2)-H), 5.37 (1 H, ddd, *J* 11.8, 4.4 and 1.4, C(1)-H), 2.59-2.21 (5 H, m, 2 x C(5)-H*,* 2 xC(7)-Hand C*H*(CH3)2), 2.07-2.02 (1 H, m, C(6)-H), 1.81-1.64 (1 H, m, C(6)-H), 1.11 (3 H, d, *J* 6.8, CH3) and 1.08 (3 H, d, *J* 6.8, CH3); *d*C(100 MHz) 162.0 (C=O), 161.9 (C=O), 148.8 (2 x ArC-NO2), 148.6 (2 x ArC-NO2), 141.4 (C(3)), 133.7 (ArC), 133.6 (ArC), 132.5 (C(4)), 129.5 (2 x ArC-H), 129.5 (2 x ArC-H), 122.7 (ArC-H), 122.5 (ArC-H), 76.7 (C(2)), 76.4 (C(1)), 36.1 (*C*H(CH3)2), 31.4 (C(7)), 26.6 (C(5)), 25.2 (C(6)), 21.3 (CH3) and 21.2 (CH3); *m/z* [CI + (NH3)] 576 (M + NH4+, 100%), 546 (40), 137 (100) and 109 (50) (Found: M + NH4+, 576.1583. C24H26N5O12 requires 576.1578); Chiral HPLC gave resolution of both enantiomers: OD Column, 80% EtOH in hexane, 0.75 cm3 min–1, *t*R 31.3 and 40.3.

3-Isopropylcyclohept-3-ene-1,2-diol having [a]23D –43.0 (c 0.66 in CHCl3) was determined to have 85% ee following derivatisation as described above (major enantiomer elutes second).

***cis,cis-*1,2-Bis(3,5-dinitrobenzoate)-4-(*tert*-butyldimethylsilyloxy)-7-isopropylcyclohept-6-ene**

A mixture of *cis,cis-*4-(*tert*-butyldimethylsilyloxy)-7-isopropylcyclohept-6-ene-1,2-diol **46** (8 mg, 27 mmol), 3,5-dinitrobenzoyl chloride (67 mg, 270 mmol, 10 equiv.) and Et3N (75 mL, 530 mmol, 20 equiv.) in CH2Cl2 (1 cm3) was stirred together for 16 h. Following absorption onto silica gel (1.0 g) the *diester* (15 mg, 81%) was obtained as a white solid by column chromatography (SiO2, 20% Et2O in petrol); *R*f 0.35 (20% Et2O in petrol); mp. 81-83 °C (EtOH); (Found: C, 51.8; H, 5.2; N, 7.8. C30H36N4O13Si requires C, 52.3; H, 5.3; N, 8.2%); *n*max/cm–1 (CHCl3) 3103m, 2958s, 2930s, 2858m, 1732s, 1629m, 1547s, 1462m, 1345s, 1287s and 1168s; *d*H(400 MHz) 9.30 (1 H, t, *J* 2.0, ArH), 9.25 (1 H, t, *J* 2.0, ArH), 9.19 (2 H, d, *J* 2.0, 2 x ArH), 9.09 (2 H, d, *J* 2.0, 2 x ArH), 5.98 (1 H, br s, C(1)-H), 5.91 (1 H, dd, *J* 10.0 and 4.2, C(6)-H), 5.33 (1 H, ddd, *J* 12.6, 4.2 and 1.2, C(2)-H), 3.83 (1 H, tt, *J* 10.8 and 2.8, C(4)-H), 2.78 (1 H, ddd, *J* 14.4, 10.8 and 4.2, C(5)-H), 2.60-2.28 (4 H, m, 2 x C(3)-H, C(5)-H and C*H*(CH3)2), 1.12 (3 H, d, *J* 6.8, CH(C*H*3)2), 1.09 (3 H, d, *J* 6.8, CH(C*H*3)2), 0.92 (9 H, s, C(CH3)3), 0.14 (3 H, s, SiCH3) and 0.12 (3 H, s, SiCH3); *d*C(100 MHz) 162.1 (C=O), 161.8 (C=O), 148.9 (2 x ArC-NO2), 148.7 (2 x ArC-NO2), 143.0 (C(7)), 133.5 (ArC), 133.4 (ArC), 129.6 (2 x ArC-H), 129.5 (2 x ArC-H), 125.8 (C(6)), 122.8 (ArC-H), 122.7 (ArC-H), 75.1 (C(1)), 73.9 (C(2)), 68.0 (C(4)), 41.0 (C(3)), 36.7 (C(5)), 36.3 (*C*H(CH3)2), 25.8 (C(*C*H3)3), 21.1 (CH(*C*H3)2), 21.0 (CH(*C*H3)2), 18.1 (*C*(CH3)3), –4.7 (SiCH3) and –4.8 (SiCH3); *m/z* [CI + (NH3)] 706 (M + NH4+, 80%), 676 (50), 477 (50), 448 (40), 438 (40), 422 (60), 420 (100), 418 (40), 392 (60), 167 (50), 137 (40), 135 (100) and 109 (80) (Found: M + NH4+, 706.2375. C30H40N5O13Si requires 706.2392); Chiral HPLC gave resolution of both enantiomers: OD Column, 80% EtOH in hexane, 0.75 cm3 min–1, *t*R 21.8 and 27.5.

*cis,cis-*4-(*tert*-Butyldimethylsilyloxy)-7-isopropylcyclohept-6-ene-1,2-diol having [a]24D –13.5 (c 1.00 in CHCl3) was determined to have 69% ee following derivatisation as described above (major enantiomer elutes second).

***cis,trans*-1,2-Bis(3,5-dinitrobenzoate)-4-(*tert-*butyldimethylsilyloxy)-7-isopropylcyclohept-6-ene**

A mixture of *trans,cis-*4-(*tert*-butyldimethylsilyloxy)-7-isopropylcyclohept-6-ene-1,2-diol **47** (9 mg, 30 mmol), 3,5-dinitrobenzoyl chloride (70 mg, 300 mmol, 10 equiv.) and Et3N (84 mL, 600 mmol, 20 equiv.) in CH2Cl2 (3 cm3) was stirred together for 16 h. Following absorption onto silica gel (1.0 g) the *diester* (11 mg, 53%) was obtained as a colourless oil by column chromatography (SiO2, 20% Et2O in petrol); *R*f 0.25 (20% Et2O in petrol); *n*max/cm–1 (Film) 3104m, 2957s, 2990s, 1732s, 1629m, 1548s, 1462m, 1345s, 1282s, 1162s, 1083s and 1027m; *d*H(400 MHz) 9.32 (1 H, t, *J* 2.0, ArH), 9.27 (1 H, t, *J* 2.0, ArH), 9.21 (2 H, d, *J* 2.4, 2 x ArH), 9.13 (2 H, d, *J* 2.4, 2 x ArH), 6.10 (1 H, s, C(1)-H), 5.87 (1 H, dd, *J* 8.4 and 4.4, C(6)-H), 5.79 (1 H, ddd, *J* 11.2, 4.0 and 1.2, C(2)-H), 4.37 (1 H, br s, C(4)-H), 2.27 (1 H, dd, *J* 15.4 and 4.6, C(5)-H), 2.64-2.52 (3 H, m, C(3)-H, C(5)-H and C*H*(CH3)2), 2.34-2.28 (1 H, m, C(3)-H), 1.17 (3 H, d, *J* 6.8, CH(C*H*3)2), 1.14 (3 H, d, *J* 6.8, CH(C*H*3)2), 0.93 (9 H, s, C(CH3)3), 0.17 (3 H, s, SiCH3) and 0.16 (3 H, s, SiCH3); *d*C(100 MHz) 162.0 (C=O), 161.8 (C=O), 148.8 (2 x ArC-NO2), 148.6 (2 x ArC-NO2), 141.5 (C(7)), 133.7 (ArC), 133.6 (ArC), 129.5 (2 x ArC-H), 129.4 (2 x ArC-H), 127.0 (C(6)), 122.7 (ArC-H), 122.5 (ArC-H), 76.4 (C(1)), 73.1 (C(2)), 67.3 (C(4)), 39.0 (C(3)), 36.1 (*C*H(CH3)2), 34.2 (C(5)), 25.6 (C(*C*H3)3), 21.2 (CH(*C*H3)2), 18.0 (*C*(CH3)3), –5.0 (SiCH3) and –5.1 (SiCH3); *m/z* [CI + (NH3)] 706 (M + NH4+, 10%), 419 (10), 300 (10), 267 (25), 167 (50), 153 (40), 135 (100), 109 (30) and 52 (70) (Found: M + NH4+, 706.2388. C30H40N5O13Si requires 706.2382).

***cis,trans-*1,2-Bis(3,5-dinitrobenzoate)-7-isopropylcyclohept-6-en-4-ol**

To a solution of *cis,trans-*1,2-bis(3,5-dinitrobenzoate)-4-(*tert-*butyldimethylsilyloxy)-7-isopropylcyclohept-6-ene (10 mg, 15 mmol) in CH2Cl2 (0.5 cm3) was added BF3.Et2O (12 mL, 58 mmol, 4 equiv.). After 3 h a few drops of Et3N were added, the reaction mixture diluted with CH2Cl2 and absorbed onto silica gel (1.0 g). Following purification by column chromatography (SiO2, 80% Et2O in petrol) the *alcohol* was obtained as a white solid (5 mg, 60%); *R*f 0.20 (80% Et2O in petrol); mp. 86 °C (decomp.); *n*max/cm–1 (KBr) 3436w br, 3102m, 2961m, 1733s, 1630m, 1546s, 1461m, 1346s, 1282s and 1162s; *d*H(400 MHz) 9.25 (1 H, t, *J* 2.4, ArH), 9.21 (1 H, t, *J* 2.4, ArH), 9.13 (2 H, d, *J* 2.4, 2 x ArH), 9.05 (2 H, d, *J* 2.4, 2 x ArH), 6.09 (1 H, br s, C(1)-H), 5.88 (1 H, dd, *J* 8.0 and 5.2, C(6)-H), 5.71 (1 H, ddd, *J* 10.8, 4.4 and 0.8, C(2)-H), 4.37 (1 H, br s, C(4)-H), 2.80 (1 H, br s, OH), 2.77 (1 H, dd, *J* 15.2 and 4.8, C(5)-H), 2.67-2.46 (3 H, m, C(3)-H, C(5)-H and C*H*(CH3)2), 2.38-2.32 (1 H, m, C(3)-H), 1.12 (3 H, d, *J* 6.8, CH(C*H*3)2) and 1.08 (3 H, d, *J* 6.8, CH(C*H*3)2); *d*C(100 MHz) 162.0 (C=O), 161.9 (C=O), 148.8 (2 x ArC-NO2), 148.6 (2 x ArC-NO2), 142.8 (C(7)), 133.5 (ArC), 133.4 (ArC), 129.5 (2 x ArC-H), 129.4 (2 x ArC-H), 126.0 (C(6)), 122.8 (ArC-H), 122.6 (ArC-H), 76.0 (C(1)), 72.7 (C(2)), 66.4 (C(4)), 38.1 (C(3)), 35.9 (*C*H(CH3)2), 33.9 (C(5)), 21.3 (CH(*C*H3)2) and 21.2 (CH(*C*H3)2); *m/z* [CI + (NH3)] 592 (M + NH4+, 80%), 562 (100), 532 (40), 324 (65), 303 (80) and 277 (50) (Found: M + NH4+, 592.1526. C24H26N5O13 requires 592.1527); Chiral HPLC gave resolution of both enantiomers: AD Column, 20% EtOH in hexane, 0.75 cm3 min–1, *t*R 43.9 and 51.5.

*cis,trans-*4-(*tert*-Butyldimethylsilyloxy)-7-isopropylcyclohept-6-ene-1,2-diol having [a]25D –58.8 (c 1.00 in CHCl3) was determined to have 84% ee following the two step derivatisation described above (major enantiomer elutes second).
